# Supplementary material
Source: MDPI journal article supplement (https://www.mdpi.com/2673-8007/4/1/21)
Supplement: s1 [file s1]

# Mapping Selected Emergent Marine Toxin-Producing Organisms Using Historical Samples with Two Methods (Biosensors and Real-Time PCR): A Comparison of Resolution

Gerado Mengs <sup>1</sup>, Rowena F. Stern <sup>2,\*</sup>, Jessica L. Clarke <sup>3</sup>, Matthew Faith <sup>4</sup> and Linda K. Medlin <sup>2</sup>

<sup>1</sup> EcoToxilab, Calle Juan XXIII, 10 Tielmes, 28550 Madrid, Spain; gmengs@ecotoxilab.com

<sup>2</sup> Marine Biological Association, Citadel Hill, Plymouth PL1 2PB, UK; lkm@mba.ac.uk

<sup>3</sup> School of Natural and Environmental Sciences, Newcastle University, Newcastle upon Tyne NE1 7RU, UK; j.clarke14@ncl.ac.uk

<sup>4</sup> School of Biological and Marine Science, University of Plymouth, Drake Circus, Plymouth PL4 8AA, UK; matthew.faith@plymouth.ac.uk

\* Correspondence: rost@mba.ac.uk

**Supplemental Table S1.** Summary of PCR reactions from various CPR stations and positive controls in yellow (full D1/D2 LSU and in blue 378F+D2CR.)

| Sample Name                           |  | Round 1<br>PCR<br>Successful | Primers<br>Used | Round<br>2 PCR<br>Successful | Primers<br>Used |
|---------------------------------------|--|------------------------------|-----------------|------------------------------|-----------------|
| <i>Karlodinium micrum</i>             |  | Yes-500bp (strong)           | D1R + D2C       |                              |                 |
| <i>Prorocentrum micans</i>            |  | Yes-500bp, 300 bp            | D1R + D2C       |                              |                 |
| <i>Gymnodinium catenatum</i>          |  | No                           | D1R + D2C       |                              |                 |
| <i>Karlodinium micrum</i>             |  | Yes-500bp (strong)           | D1R + D2C       |                              |                 |
| <i>Prorocentrum micans</i>            |  | Yes-500bp, 700 bp, 300 bp    | D1R + D2C       |                              |                 |
| <i>Gymnodinium catenatum</i>          |  | No                           | D1R + D2C       |                              |                 |
| <i>Karlodinium micrum</i>             |  | Yes-500bp (strong), 300 bp   |                 | No                           | D1R + D1-548R   |
| <i>Prorocentrum micans</i>            |  | Yes-500 (light)              |                 | No                           | D1R + D1-548R   |
| <i>Gymnodinium catenatum</i>          |  | No                           |                 | No                           | D1R + D1-548R   |
| <i>Pseudo-nitzschia delicatissima</i> |  | No                           | D1R + Atac3     |                              |                 |
| <i>Gymnodinium mikimotoi</i>          |  | Yes-500bp                    | D1R + Atac3     |                              |                 |
| <i>Gymnodinium catenatum</i>          |  | Yes-500bp                    | D1R + Atac3     |                              |                 |

|                                       |  |                      |            |    |                  |
|---------------------------------------|--|----------------------|------------|----|------------------|
| <i>Pseudo-nitzschia delicatissima</i> |  | No                   | 378F + D2C |    |                  |
| <i>Pseudo-nitzschia delicatissima</i> |  | No / No              | D1R + D2C  |    |                  |
| <i>Gymnodinium mikimotoi</i>          |  | No / No              | D1R + D2C  |    |                  |
| <i>Gymnodinium catenatum</i>          |  | No / No              | D1R + D2C  |    |                  |
| 5 SWL 4                               |  | No                   | D1R + D2C  |    |                  |
| 13 SWL 35 (2)                         |  | Yes-500bp            | D1R + D2C  |    |                  |
| SWL control                           |  | No                   | D1R + D2C  |    |                  |
| 608SB-6F                              |  | Yes-4-500bp          | D1R + D2C  |    |                  |
| 608SB-6F + <i>K. micrum</i> spike     |  | Yes-500bp            | D1R + D2C  |    |                  |
| 5 SWL 4                               |  | No                   |            | No | D1R + D1<br>548R |
| 13 SWL 35 (2)                         |  | Yes-400bp            |            | No | D1R + D1<br>548R |
| SWL con                               |  | No                   |            | No | D1R + D1<br>548R |
| 608SB6F                               |  | Yes-500bp,<br>300 bp |            | No | D1R + D1<br>548R |
| 608SB6F + <i>K. micrum</i> spike      |  | Yes-500bp,<br>300 bp |            | No | D1R + D1<br>548R |
| 608SB 40                              |  | No                   | D1R + D2C  |    |                  |
| 608SB 24B                             |  | No                   | D1R + D2C  |    |                  |
| 608SB 46F                             |  | No                   | D1R + D2C  |    |                  |
| 618SA 25                              |  | No                   | D1R + D2C  |    |                  |
| 608SB 26F                             |  | No                   | D1R + D2C  |    |                  |
| 608SB 16F                             |  | No                   | D1R + D2C  |    |                  |
| 608SB 36F                             |  | No                   | D1R + D2C  |    |                  |
| 608SB 44D                             |  | No                   | D1R + D2C  |    |                  |
| 608SB 40                              |  | No                   | D1R + D2C  |    |                  |
| 608SB 24B                             |  | Yes-500bp            | D1R + D2C  |    |                  |
| 608SB 46F                             |  | Yes-500bp            | D1R + D2C  |    |                  |
| 618SA 25                              |  | No                   | D1R + D2C  |    |                  |
| 608SB 26F                             |  | Yes-500bp,<br>300 bp | D1R + D2C  |    |                  |
| 608SB 36F                             |  | Yes-500bp            | D1R + D2C  |    |                  |
| 608SB 44D                             |  | No                   | D1R + D2C  |    |                  |
| 608SB 3                               |  | No                   | D1R + D2C  |    |                  |
| 608SB 13                              |  | No                   | D1R + D2C  |    |                  |
| 608SB 19                              |  | No                   | D1R + D2C  |    |                  |
| 608SB 25                              |  | No                   | D1R + D2C  |    |                  |

|          |  |           |               |                    |               |
|----------|--|-----------|---------------|--------------------|---------------|
| 608SB 31 |  | No        | D1R + D2C     |                    |               |
| 608SB 33 |  | No        | D1R + D2C     |                    |               |
| 608SB 35 |  | No        | D1R + D2C     |                    |               |
| 608SB 37 |  | No        | D1R + D2C     |                    |               |
| 608SB 39 |  | Yes-500bp | D1R + D2C     |                    |               |
| 608SB 3  |  |           |               | No                 | D186F + D154R |
| 608SB 13 |  |           |               | No                 | D186F + D154R |
| 608SB 19 |  |           |               | No                 | D186F + D154R |
| 608SB 25 |  |           |               | No                 | D186F + D154R |
| 608SB 31 |  |           |               | No                 | D186F + D154R |
| 608SB 33 |  |           |               | No                 | D186F + D154R |
| 608SB 35 |  |           |               | No                 | D186F + D154R |
| 608SB 37 |  |           |               | No                 | D186F + D154R |
| 608SB 39 |  |           |               | No                 | D186F + D154R |
| 608SB 3  |  |           |               | Yes-300bp (strong) | 378F + D2C    |
| 608SB 13 |  |           |               | No                 | 378F + D2C    |
| 608SB 19 |  |           |               | No                 | 378F + D2C    |
| 608SB 25 |  |           |               | Yes-300bp (strong) | 378F + D2C    |
| 608SB 31 |  |           |               | Yes-300bp (strong) | 378F + D2C    |
| 608SB 33 |  |           |               | No                 | 378F + D2C    |
| 608SB 35 |  |           |               | Yes-300bp (strong) | 378F + D2C    |
| 608SB 37 |  |           |               | Yes-300bp (strong) | 378F + D2C    |
| 608SB 39 |  |           |               | Yes-300bp (strong) | 378F + D2C    |
| 608SB 3  |  | No        | D186F + D154R |                    |               |
| 608SB 13 |  | No        | D186F + D154R |                    |               |
| 608SB 19 |  | No        | D186F + D154R |                    |               |
| 608SB 25 |  | No        | D186F + D154R |                    |               |
| 608SB 31 |  | No        | D186F + D154R |                    |               |
| 608SB 33 |  | No        | D186F + D154R |                    |               |

|                                      |  |           |               |  |  |
|--------------------------------------|--|-----------|---------------|--|--|
| 608SB 35                             |  | No        | D186F + D1 54 |  |  |
| 608SB 37                             |  | No        | D186F + D1 54 |  |  |
| 608SB 39                             |  | No        | D186F + D1 54 |  |  |
| 618SA 25                             |  | No        | D186F + D1 54 |  |  |
| 2-473SA 13                           |  | No        | D186F + D1 54 |  |  |
| 4 SWL 34                             |  | No        | D186F + D1 54 |  |  |
| 4 SWL 36(2)                          |  | No        | D186F + D1 54 |  |  |
| 4 SWL 40(2)                          |  | No        | D186F + D1 54 |  |  |
| 5 SWL 7(1)                           |  | No        | D186F + D1 54 |  |  |
| PO4-511 GAT                          |  | No        | D186F + D1 54 |  |  |
| PO4-5119                             |  | No        | D186F + D1 54 |  |  |
| 8 SWL 38 (1)                         |  | No        | D186F + D1 54 |  |  |
| 114 5 SWL 4                          |  | No        | D186F + D1 54 |  |  |
| SWL 2018 con                         |  | No        | D186F + D1 54 |  |  |
| PO4305E                              |  | No        | D186F + D1 54 |  |  |
| 4 SWL 38                             |  | No        | D186F + D1 54 |  |  |
| SWL con 2019<br>CONTROL              |  | No        | D186F + D1 54 |  |  |
| <i>P. delicatissima</i><br>CONTROL + |  | Yes-300bp | D186F + D1 54 |  |  |
| 608SB 3                              |  | No        | 378F + D2C    |  |  |
| 608SB 13                             |  | No        | 378F + D2C    |  |  |
| 608SB 19                             |  | No        | 378F + D2C    |  |  |
| 608SB 25                             |  | No        | 378F + D2C    |  |  |
| 608SB 31                             |  | No        | 378F + D2C    |  |  |
| 608SB 33                             |  | No        | 378F + D2C    |  |  |
| 608SB 35                             |  | No        | 378F + D2C    |  |  |
| 608SB 37                             |  | No        | 378F + D2C    |  |  |
| 608SB 39                             |  | Yes-300bp | 378F + D2C    |  |  |
| 618SA 25                             |  | No        | 378F + D2C    |  |  |
| 2-473SA 13                           |  | No        | 378F + D2C    |  |  |
| 4 SWL 34                             |  | No        | 378F + D2C    |  |  |
| 4 SWL 36(2)                          |  | No        | 378F + D2C    |  |  |
| 4 SWL 40(2)                          |  | No        | 378F + D2C    |  |  |
| 5 SWL 7(1)                           |  | No        | 378F + D2C    |  |  |
| PO4-511 GAT                          |  | No        | 378F + D2C    |  |  |
| PO4-5119                             |  | No        | 378F + D2C    |  |  |
| 8 SWL 38 (1)                         |  | No        | 378F + D2C    |  |  |
| 114 5 SWL 4                          |  | No        | 378F + D2C    |  |  |
| SWL 2018 con                         |  | No        | 378F + D2C    |  |  |
| PO4305E                              |  | No        | 378F + D2C    |  |  |
| 4 SWL 38                             |  | No        | 378F + D2C    |  |  |

|                         |  |                |             |  |  |
|-------------------------|--|----------------|-------------|--|--|
| SWL con 2019<br>CONTROL |  | No             | 378F + D2C  |  |  |
| 618SA 25                |  | No / No        | D1R + D2C   |  |  |
| 2-473SA 13              |  | Yes-300bp / No | D1R + D2C   |  |  |
| 4 SWL 34                |  | Yes-300bp / No | D1R + D2C   |  |  |
| 4 SWL 36(2)             |  | No / No        | D1R + D2C   |  |  |
| 4 SWL 40(2)             |  | No / No        | D1R + D2C   |  |  |
| 5 SWL 7(1)              |  | No / No        | D1R + D2C   |  |  |
| PO4-511 GAT             |  | Yes-300bp / No | D1R + D2C   |  |  |
| PO4-5119                |  | No / No        | D1R + D2C   |  |  |
| 8 SWL 38 (1)            |  | No / No        | D1R + D2C   |  |  |
| 114 5 SWL 4             |  | Yes-300bp / No | D1R + D2C   |  |  |
| SWL 2018 con            |  | Yes-300bp / No | D1R + D2C   |  |  |
| PO4305E                 |  | No / No        | D1R + D2C   |  |  |
| 4 SWL 38                |  | No / No        | D1R + D2C   |  |  |
| SWL con 2019            |  | Yes-300bp / No | D1R + D2C   |  |  |
| 608SB 3                 |  | No             | D1R + Atac3 |  |  |
| 608SB 13                |  | No             | D1R + Atac3 |  |  |
| 608SB 19                |  | Yes-200bp      | D1R + Atac3 |  |  |
| 608SB 25                |  | No             | D1R + Atac3 |  |  |
| 608SB 31                |  | No             | D1R + Atac3 |  |  |
| 608SB 33                |  | Yes-200bp      | D1R + Atac3 |  |  |
| 608SB 35                |  | No             | D1R + Atac3 |  |  |
| 608SB 37                |  | No             | D1R + Atac3 |  |  |
| 608SB 39                |  | Yes-200bp      | D1R + Atac3 |  |  |
| 618SA 25                |  | Yes-200bp      | D1R + Atac3 |  |  |
| 2-473SA 13              |  | Yes-200bp      | D1R + Atac3 |  |  |
| 4 SWL 34                |  | No             | D1R + Atac3 |  |  |
| 4 SWL 36(2)             |  | No             | D1R + Atac3 |  |  |
| 4 SWL 40(2)             |  | No             | D1R + Atac3 |  |  |
| 5 SWL 7(1)              |  | Yes-500bp      | D1R + Atac3 |  |  |
| PO4-511 GAT             |  | No             | D1R + Atac3 |  |  |
| PO4-5119                |  | Yes-500bp      | D1R + Atac3 |  |  |
| 8 SWL 38 (1)            |  | Yes-500bp      | D1R + Atac3 |  |  |
| 114 5 SWL 4             |  | No             | D1R + Atac3 |  |  |
| SWL 2018 con            |  | No             | D1R + Atac3 |  |  |
| PO4305E                 |  | No             | D1R + Atac3 |  |  |
| 4 SWL 38                |  | No             | D1R + Atac3 |  |  |
| SWL con 2019            |  | No             | D1R + Atac3 |  |  |
| 608SB 3                 |  | No             | D1R + Alex  |  |  |
| 608SB 13                |  | No             | D1R + Alex  |  |  |
| 608SB 19                |  | No             | D1R + Alex  |  |  |

|           |  |    |            |  |  |
|-----------|--|----|------------|--|--|
| 608SB 25  |  | No | D1R + Alex |  |  |
| 608SB 31  |  | No | D1R + Alex |  |  |
| 608SB 33  |  | No | D1R + Alex |  |  |
| 608SB 35  |  | No | D1R + Alex |  |  |
| 608SB 37  |  | No | D1R + Alex |  |  |
| 608SB 39  |  | No | D1R + Alex |  |  |
| 5 SWL (1) |  | No | D1R + Alex |  |  |
| 13 SWL 35 |  | No | D1R + Alex |  |  |
| PO 4511 G |  | No | D1R + Alex |  |  |
| 608SB 3   |  | No | D1R + Amin |  |  |
| 608SB 13  |  | No | D1R + Amin |  |  |
| 608SB 19  |  | No | D1R + Amin |  |  |
| 608SB 25  |  | No | D1R + Amin |  |  |
| 608SB 31  |  | No | D1R + Amin |  |  |
| 608SB 33  |  | No | D1R + Amin |  |  |
| 608SB 35  |  | No | D1R + Amin |  |  |
| 608SB 37  |  | No | D1R + Amin |  |  |
| 608SB 39  |  | No | D1R + Amin |  |  |
| 5 SWL (1) |  | No | D1R + Amin |  |  |
| 13 SWL 35 |  | No | D1R + Amin |  |  |
| PO 4511 G |  | No | D1R + Amin |  |  |

**Supplemental information S1:** Sanger sequencing of *Pseudo-nitzschia delicatissima* CCAP 1061/41 partial LSU amplicon (Genbank submission, [SUB13994573](#), awaiting accession number)

> *Pseudo-nitzschia delicatissima* CCAP1061/41

TTGGTGGTAAATTCCATCTAAAGCTAAATATTGGTGGGAGACCGATAGCGTACAAGT  
ACCGTGAGGGAAAGATGCAAAGAACTTTGAAAAGAGAGTTAAAGAGTACCTGAAA  
TTGCTGAAACGGAAGCGAAGGAAACCACTGTTTGTGTTGTTTCATATTTCCCTGGCCAC  
TTGTGGTTTGGGCGCTGTGAGCTTGCGTGGGTTTGCTTTGGTTGAA

## D1R-D2C

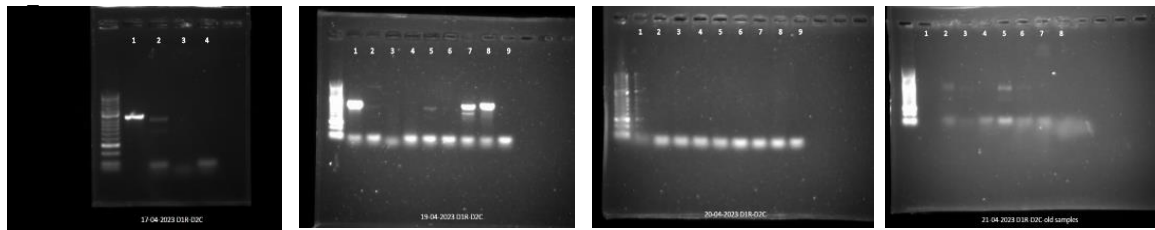

## D1R-D1-548R

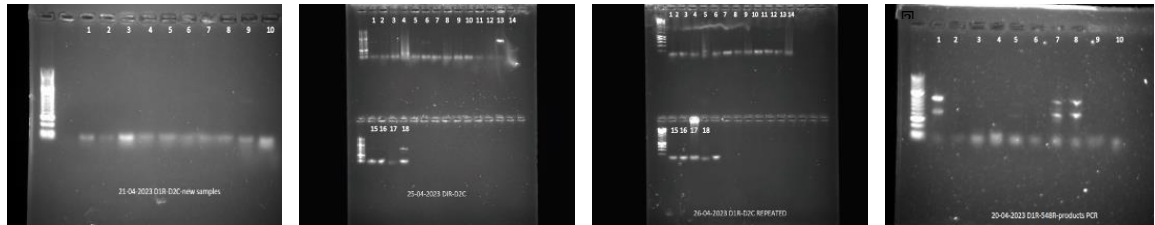

## D186-D1-548R

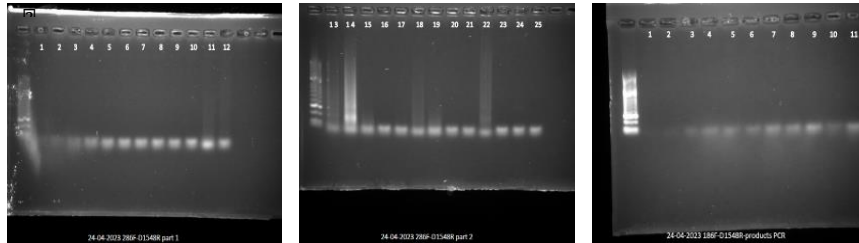

## 378R-D2C

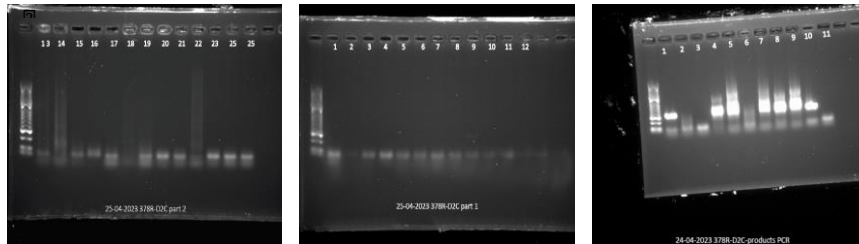

## D1R-Acat3

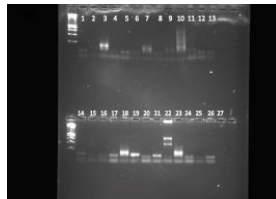

## D1R-Alex1

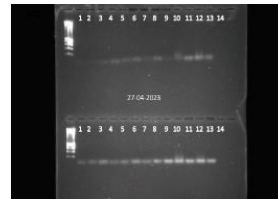

## D1R-Amin2

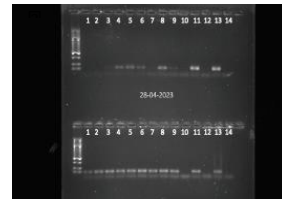

**Supplemental Figure S1.** Summary of gel documentation of PCR reactions showing the size and the intensity of the PCR reactions. Gels are arranged by PCR primers used in the reaction. Numbers refer to the various PCR products tested here plus the last number is the blank for each different gel or experiment. Each gel is a different station and different primer combination.

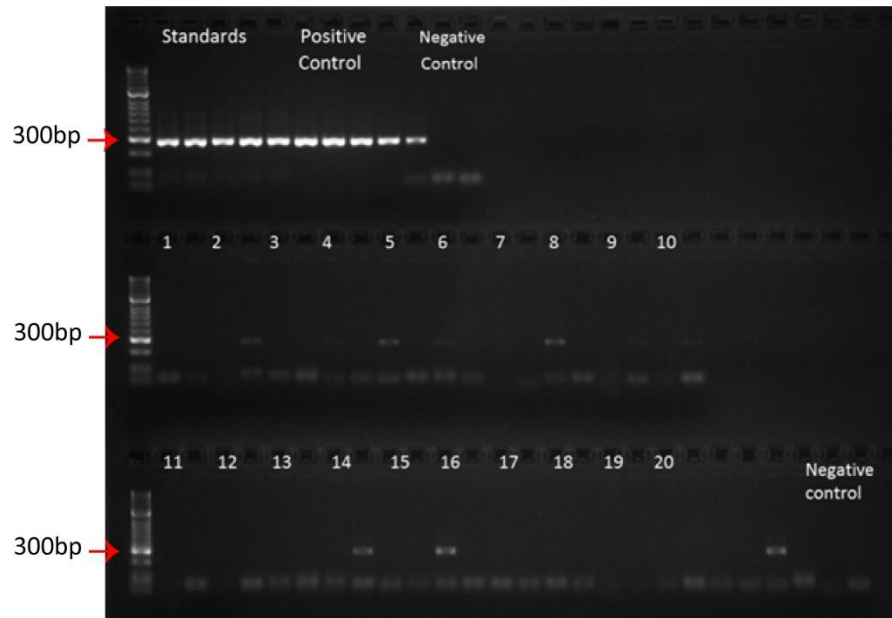

**Supplemental Figure S2.** Agarose gel of *P. delicatissima* LSU products following completion of HRM-qRT-PCR assay on DNA standards, positive *P. delicatissima* DNA positive control and negative no template control (top row). Middle and bottom rows show PCR products from CPR samples preserved in 4% formalin (1-10) and 2% formalin (11-20) respectively. Ladder: 50bp Hyperladder. Red arrows indicate three relative size points in the ladder.
